# Supplementary material
Source: HighWire-hosted journal article supplement (https://bmjopensem.bmj.com/content/suppl/2024/01/04/10.1.e001787)
Supplement: bmjsem-2023-001787supp001_data_supplement.pdf [file bmjsem-2023-001787supp001_data_supplement.pdf]

## 1 SUPPLEMENTAL MATERIAL

## 2 Supplemental Material S1: Flow chart

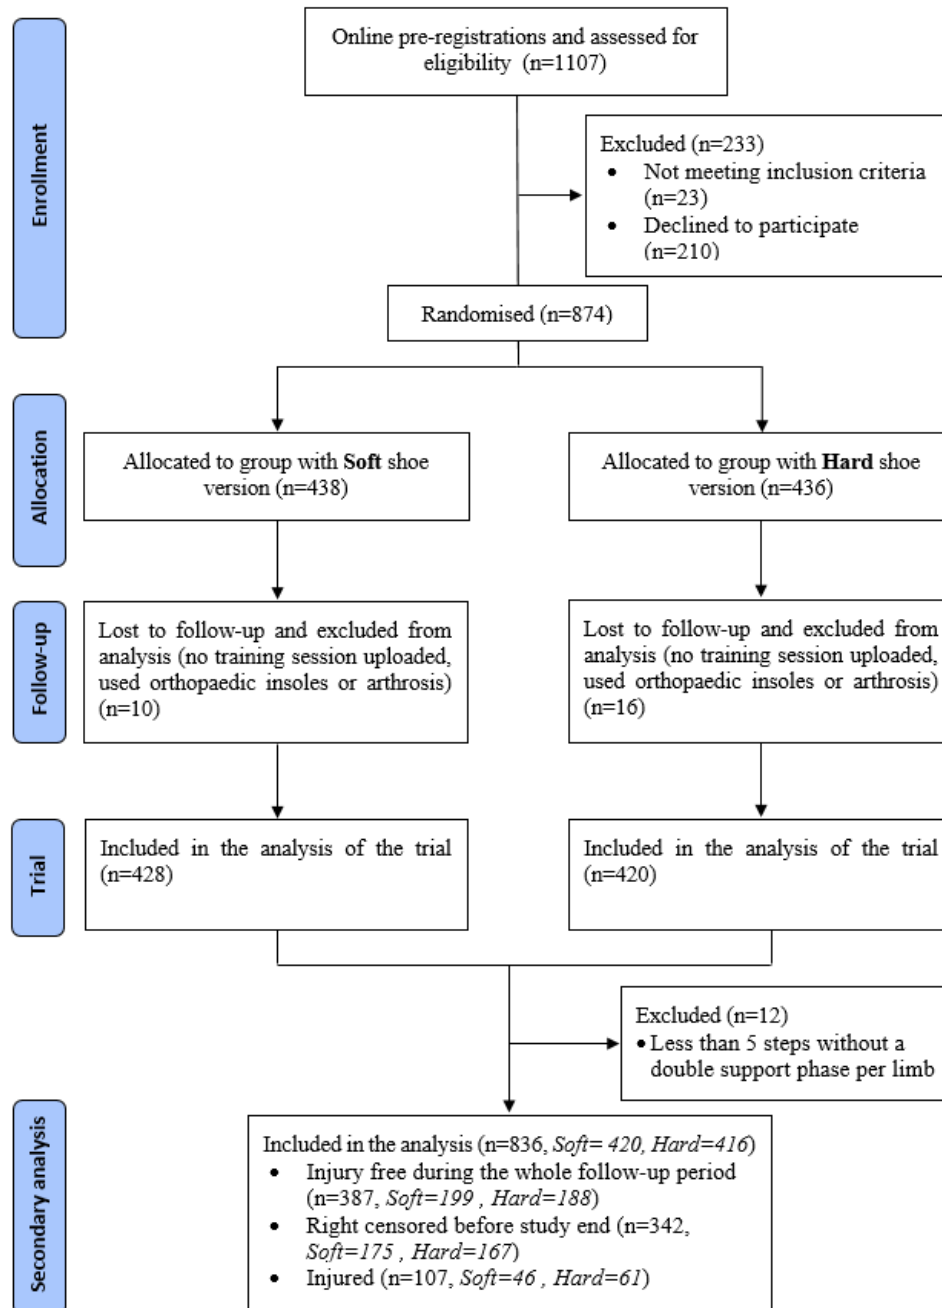

3

4

5

1 **Supplemental Material S2: Correlation matrix between asymmetries in the spatiotemporal and kinetic variables (n=836).**

|                                | Step length              | Contact time             | Flight time              | Duty factor              | Vertical displ. of CoM   | Vertical Stiffness       | Peak vertical force   | Peak breaking force      | Peak propulsive force | VIP                      | Time to VIP              | Vertical instant. loading rate | Vertical average loading rate |
|--------------------------------|--------------------------|--------------------------|--------------------------|--------------------------|--------------------------|--------------------------|-----------------------|--------------------------|-----------------------|--------------------------|--------------------------|--------------------------------|-------------------------------|
| Step length                    | 1.00                     |                          |                          |                          |                          |                          |                       |                          |                       |                          |                          |                                |                               |
| Contact time                   | 0.32<br><b>&lt;0.001</b> | 1.00                     |                          |                          |                          |                          |                       |                          |                       |                          |                          |                                |                               |
| Flight time                    | 0.31<br><b>&lt;0.001</b> | 0.97<br><b>&lt;0.001</b> | 1.00                     |                          |                          |                          |                       |                          |                       |                          |                          |                                |                               |
| Duty factor                    | 0.31<br><b>&lt;0.001</b> | 0.99<br><b>&lt;0.001</b> | 0.97<br><b>&lt;0.001</b> | 1.00                     |                          |                          |                       |                          |                       |                          |                          |                                |                               |
| Vertical displ. of CoM         | 0.27<br><b>&lt;0.001</b> | 0.02<br><i>0.645</i>     | 0.03<br><i>0.373</i>     | 0.2<br><i>0.665</i>      | 1.00                     |                          |                       |                          |                       |                          |                          |                                |                               |
| Vertical Stiffness             | 0.11<br><b>0.001</b>     | 0.13<br><b>&lt;0.001</b> | 0.12<br><b>&lt;0.001</b> | 0.13<br><b>&lt;0.001</b> | 0.52<br><b>&lt;0.001</b> | 1.00                     |                       |                          |                       |                          |                          |                                |                               |
| Peak vertical force            | 0.04<br><i>0.288</i>     | 0.32<br><b>&lt;0.001</b> | 0.30<br><b>&lt;0.001</b> | 0.32<br><b>&lt;0.001</b> | 0.35<br><b>&lt;0.001</b> | 0.14<br><b>&lt;0.001</b> | 1.00                  |                          |                       |                          |                          |                                |                               |
| Peak breaking force            | 0.02<br><i>0.479</i>     | 0.01<br><i>0.748</i>     | -0.01<br><i>0.872</i>    | 0.01<br><i>0.729</i>     | 0.11<br><b>&lt;0.001</b> | 0.13<br><b>&lt;0.001</b> | 0.03<br><i>0.467</i>  | 1.00                     |                       |                          |                          |                                |                               |
| Peak propulsive force          | 0.05<br><i>0.167</i>     | 0.08<br><b>0.024</b>     | 0.09<br><b>0.014</b>     | 0.08<br><b>0.024</b>     | 0.13<br><b>&lt;0.001</b> | 0.15<br><b>&lt;0.001</b> | 0.10<br><b>0.004</b>  | 0.10<br><b>0.006</b>     | 1.00                  |                          |                          |                                |                               |
| VIP                            | 0.10<br><b>0.005</b>     | 0.06<br><i>0.068</i>     | 0.06<br><i>0.073</i>     | 0.06<br><i>0.074</i>     | 0.01<br><i>0.803</i>     | 0.06<br><i>0.107</i>     | -0.01<br><i>0.979</i> | 0.15<br><b>&lt;0.001</b> | 0.06<br><i>0.080</i>  | 1.00                     |                          |                                |                               |
| Time to VIP                    | 0.17<br><b>&lt;0.001</b> | 0.17<br><b>&lt;0.001</b> | 0.16<br><b>&lt;0.001</b> | 0.17<br><b>&lt;0.001</b> | 0.01<br><i>0.777</i>     | 0.03<br><i>0.410</i>     | 0.09<br><b>0.009</b>  | 0.11<br><b>0.001</b>     | 0.11<br><b>0.002</b>  | 0.23<br><b>&lt;0.001</b> | 1.00                     |                                |                               |
| Vertical instant. loading rate | 0.06<br><i>0.069</i>     | 0.06<br><i>0.090</i>     | 0.07<br><b>0.034</b>     | 0.06<br><i>0.092</i>     | 0.08<br><b>0.016</b>     | 0.09<br><b>0.010</b>     | -0.01<br><i>0.686</i> | 0.14<br><b>&lt;0.001</b> | 0.10<br><b>0.003</b>  | 0.69<br><b>&lt;0.001</b> | 0.22<br><b>&lt;0.001</b> | 1.00                           |                               |
| Vertical average loading rate  | 0.14<br><b>&lt;0.001</b> | 0.02<br><i>0.548</i>     | 0.02<br><i>0.513</i>     | 0.02<br><i>0.566</i>     | 0.01<br><i>0.815</i>     | 0.03<br><i>0.341</i>     | -0.02<br><i>0.488</i> | 0.10<br><b>0.005</b>     | 0.04<br><b>0.267</b>  | 0.63<br><b>&lt;0.001</b> | 0.57<br><b>&lt;0.001</b> | 0.49<br><b>&lt;0.001</b>       | 1.00                          |

2 P-values are presented in *Italic*; P-values <0.05 are presented in Bold; CoM: Center of Mass; VIP: Vertical Impact Peak

3

4

1 **Supplemental Material S3: Characteristics of self-reported running-related injuries (n=107).**

|                        | All participants |      |
|------------------------|------------------|------|
|                        | <i>N</i>         | %    |
| <i>Injury location</i> |                  |      |
| Buttock / Pelvis       | 6                | 5.6  |
| Hip/groin              | 3                | 2.8  |
| Thigh                  | 8                | 7.5  |
| Knee                   | 26               | 24.3 |
| Lower leg              | 23               | 21.5 |
| Ankle                  | 22               | 20.6 |
| Foot                   | 19               | 17.7 |
| <i>Injury type</i>     |                  |      |
| Tendon                 | 63               | 58.9 |
| Muscle                 | 21               | 19.6 |
| Capsules and ligaments | 5                | 4.7  |
| Bone structures        | 4                | 3.7  |
| Other overuse injuries | 14               | 13.1 |
| <i>Injury severity</i> |                  |      |
| Moderate (8-28 days)   | 68               | 63.6 |
| Major (>28 days)       | 39               | 36.4 |
| <i>Context</i>         |                  |      |
| Training               | 102              | 95.3 |
| Competition            | 5                | 4.7  |

- 2 Only running-related overuse injuries to the lower limb are included (running-related injuries not  
 3 associated to one of the limbs, such as lower back injuries, are considered as competing injuries).  
 4

1 **Supplemental Material S4: Correlation between personal characteristics and asymmetry in**  
 2 **spatiotemporal and kinetic variables (n=836).**

|                                | Leg length SI            | Sex                   | Age                   | Height                | Body mass             | Fat mass                  | Prev. inj             | Run. exp.             | Run. reg.             | Shoe version             | Run. speed            |
|--------------------------------|--------------------------|-----------------------|-----------------------|-----------------------|-----------------------|---------------------------|-----------------------|-----------------------|-----------------------|--------------------------|-----------------------|
| Step length                    | -0.06<br><i>0.090</i>    | -0.05<br><i>0.168</i> | -0.04<br><i>0.292</i> | -0.02<br><i>0.585</i> | -0.02<br><i>0.540</i> | -0.08<br><b>0.027</b>     | 0.02<br><i>0.514</i>  | -0.01<br><i>0.852</i> | 0.01<br><i>0.827</i>  | -0.09<br><b>0.010</b>    | 0.01<br><i>0.930</i>  |
| Contact time                   | 0.06<br><i>0.106</i>     | -0.04<br><i>0.211</i> | -0.05<br><i>0.141</i> | 0.02<br><i>0.570</i>  | -0.07<br><b>0.044</b> | -0.13<br><b>&lt;0.001</b> | 0.03<br><i>0.415</i>  | -0.01<br><i>0.843</i> | 0.048<br><i>0.170</i> | -0.01<br><i>0.845</i>    | 0.04<br><i>0.204</i>  |
| Flight time                    | 0.07<br><i>0.056</i>     | 0.01<br><i>0.803</i>  | -0.01<br><i>0.804</i> | 0.01<br><i>0.912</i>  | -0.04<br><i>0.216</i> | -0.03<br><i>0.333</i>     | 0.02<br><i>0.592</i>  | -0.01<br><i>0.859</i> | 0.01<br><i>0.729</i>  | -0.01<br><i>0.750</i>    | -0.08<br><b>0.029</b> |
| Duty factor                    | 0.06<br><i>0.098</i>     | -0.04<br><i>0.205</i> | -0.05<br><i>0.146</i> | 0.02<br><i>0.557</i>  | -0.07<br><b>0.044</b> | -0.13<br><b>&lt;0.001</b> | 0.03<br><i>0.401</i>  | -0.01<br><i>0.851</i> | 0.05<br><i>0.164</i>  | -0.01<br><i>0.858</i>    | 0.04<br><i>0.202</i>  |
| Vertical displ. of CoM         | 0.10<br><b>0.005</b>     | -0.08<br><b>0.026</b> | 0.03<br><i>0.329</i>  | -0.01<br><i>0.922</i> | 0.06<br><i>0.076</i>  | -0.01<br><i>0.689</i>     | 0.07<br><i>0.059</i>  | 0.05<br><i>0.139</i>  | -0.01<br><i>0.703</i> | -0.03<br><i>0.457</i>    | -0.01<br><i>0.991</i> |
| Vertical Stiffness             | 0.03<br><i>0.386</i>     | -0.06<br><i>0.073</i> | 0.02<br><i>0.565</i>  | -0.01<br><i>0.940</i> | -0.01<br><i>0.818</i> | -0.08<br><b>0.024</b>     | 0.06<br><i>0.109</i>  | 0.06<br><i>0.061</i>  | 0.09<br><b>0.012</b>  | 0.01<br><i>0.803</i>     | 0.07<br><b>0.041</b>  |
| Peak vertical force            | 0.12<br><b>0.001</b>     | -0.09<br><b>0.008</b> | 0.02<br><i>0.506</i>  | -0.01<br><i>0.888</i> | 0.01<br><i>0.979</i>  | -0.09<br><b>0.008</b>     | 0.02<br><i>0.621</i>  | 0.08<br><b>0.002</b>  | 0.01<br><i>0.944</i>  | -0.05<br><i>0.139</i>    | 0.09<br><b>0.012</b>  |
| Peak breaking force            | 0.12<br><b>&lt;0.001</b> | -0.05<br><i>0.147</i> | 0.03<br><i>0.386</i>  | 0.03<br><i>0.435</i>  | -0.01<br><i>0.728</i> | -0.08<br><b>0.025</b>     | -0.01<br><i>0.667</i> | 0.02<br><i>0.500</i>  | 0.02<br><i>0.657</i>  | -0.05<br><i>0.193</i>    | 0.06<br><i>0.080</i>  |
| Peak propulsive force          | 0.05<br><i>0.167</i>     | -0.01<br><i>0.925</i> | 0.05<br><i>0.149</i>  | -0.04<br><i>0.212</i> | -0.05<br><i>0.193</i> | -0.03<br><i>0.449</i>     | 0.04<br><i>0.258</i>  | 0.06<br><i>0.086</i>  | -0.03<br><i>0.332</i> | 0.05<br><i>0.173</i>     | -0.02<br><i>0.553</i> |
| VIP                            | 0.2<br><i>0.477</i>      | 0.04<br><i>0.213</i>  | -0.01<br><i>0.944</i> | -0.09<br><b>0.007</b> | -0.03<br><i>0.346</i> | 0.02<br><i>0.549</i>      | -0.06<br><i>0.084</i> | -0.03<br><i>0.382</i> | -0.04<br><i>0.284</i> | 0.05<br><i>0.154</i>     | -0.08<br><b>0.016</b> |
| Time to VIP                    | 0.2<br><i>0.598</i>      | 0.04<br><i>0.306</i>  | -0.02<br><i>0.593</i> | -0.04<br><i>0.253</i> | -0.04<br><i>0.198</i> | 0.01<br><i>0.970</i>      | 0.01<br><i>0.718</i>  | 0.03<br><i>0.432</i>  | -0.02<br><i>0.532</i> | -0.01<br><i>0.722</i>    | 0.01<br><i>0.978</i>  |
| Vertical instant. loading rate | 0.7<br><i>0.059</i>      | 0.05<br><i>0.122</i>  | -0.03<br><i>0.319</i> | -0.08<br><b>0.023</b> | -0.04<br><i>0.253</i> | 0.02<br><i>0.582</i>      | 0.01<br><i>0.908</i>  | -0.01<br><i>0.722</i> | -0.04<br><i>0.202</i> | 0.12<br><b>&lt;0.001</b> | -0.07<br><b>0.034</b> |
| Vertical average loading rate  | -0.01<br><i>0.702</i>    | 0.02<br><i>0.635</i>  | 0.01<br><i>0.808</i>  | -0.06<br><i>0.067</i> | 0.01<br><i>0.718</i>  | 0.04<br><i>0.290</i>      | 0.01<br><i>0.857</i>  | 0.01<br><i>0.817</i>  | -0.07<br><b>0.036</b> | 0.03<br><i>0.445</i>     | -0.08<br><b>0.020</b> |

3 P-values are presented in *Italic*; P-values <0.05 are presented in **Bold**; CoM: Center of Mass; VIP: Vertical  
 4 Impact Peak; Prev. Inj.: Previous injury; Run. exp.: Running experience; Run. reg.: Running regularity (last  
 5 12 months); SI: Symmetry Index.

6

7

1 **Supplemental Material S5:** Directed Acyclic Graph (DAG) representing the causal pathways between  
2 symmetry indices and running-related injury (RRI). Created on <http://dagitty.net>. The outcome variable is  
3 identified as a blue oval with black outline and the main exposure is identified as green ovals with black  
4 outline. Variables on the causal pathways are identified as blue ovals, determinants of the exposure as  
5 green ovals and potential confounders as red ovals.

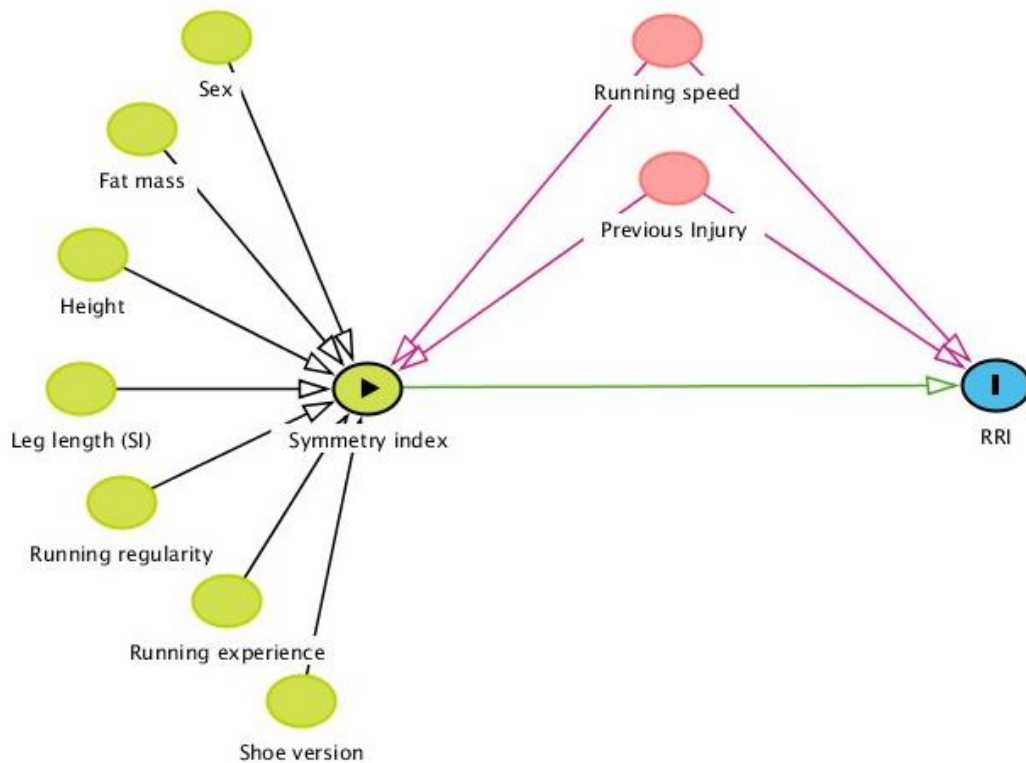

6

7
